# Supplementary material for: Learning about the meanings of ambiguous words: evidence from a word-meaning priming paradigm with short narratives
Source: PeerJ. 2022 Oct 19;10:e14070. doi: 10.7717/peerj.14070 (PMC9587715; doi:10.7717/peerj.14070)
Supplement: Supplemental Information 1 [file peerj-10-14070-s001.xlsx]

## Sheet: NOTES
The "Stimuli" tab contains a list of all stimuli used in the experiment associated with the manuscript "Learning about the meanings of ambiguous words: Evidence from a word-meaning priming paradigm with short narratives" by [AUTHORS REDACTED]
Columns contain:
Item-ID	Condition	Word	Context-sentence	Neutral-filler	Critical-sentence	Homograph	Probe_Relatedness	Probe	List-where-trained	List1	LSA	Letters.n	Freq-fpmw.SUBTLEX_UK	Syllables.eSpeak.br	Familiarity-Glasgow_Norms	AoA.Glasgow_Norms	D.GilbertRodd-2022	Prop.dominance.of.dom.meang.GilbertRodd-2022
Item number	Either an experimental ambiguous stimulus (Amb), or an item whose response was not analysed further, e.g. a practice item (Practice), lead-in item (Lead-in) or filler (Filler) in the semantic relatedness task during the priming phase	The critical ambiguous key word (or final word for non-experimental items)	First sentence which introduced the disambiguating (or background) context	Second sentence which did not add any disambiguation information	Third sentence which itself did not add any disambiguating information and ended in the critical ambiguous word	Is the key word a homograph (both meanings spelt & pronounced the same) = 1 or is it a heterograph (only pronounced the same)? "NA" for unambiguous key words.	Is the associated visual probe word related or unrelated to the narrative?	Visual probe word used in the semantic relatedness task	The experiment version (stimulus list) in which this item was trained (i.e. primed). This was counterbalanced.	Was this item trained (primed) or untrained in List 1?	LSA measure of co-occurrence between the words in the remainder of the narrative and the key word, based on http://lsa.colorado.edu/	Number of letters of the key word	Frequency per million words of the key word (according to the SUBTLEX-UK database)	Number of syllables of the key word (according to the eSpeak British English pronunciation dictionary)	Familiarity of the key word (according to the Glasgow norms)	Age of acquisition of the key word (according to the Glasgow norms)	Measure of relative dominance of the key word according to the word association database by Gilbert & Rodd 2022; based on their "D" measure (0 = entirely balanced, 1 = entirely biased towards one meaning)	Measure of dominance of the key word according to the word association database by Gilbert & Rodd 2022; based on proportion of word association responses in line with the most-commonly-provided meaning

## Sheet: Stimuli
Item-ID	Condition	Word	Context-sentence	Neutral-filler	Critical-sentence	Homograph	Probe_Relatedness	Probe	List-where-trained	List1	List2	LSA	Letters.n	Freq-fpmw.SUBTLEX_UK	Syllables.eSpeak.br	Familiarity-Glasgow_Norms	AoA.Glasgow_Norms	D.GilbertRodd-2022	Prop.dominance.of.dom.meang.GilbertRodd-2022
02	Amb	appendix	George had finished his reading in the library, amongst dust and spiderwebs.	Everything had gone well.	But then he realised he had forgotten about the appendix.	1	unrelated	pillar	2	Untrained	Trained	0.05	8	1.07199	3	NA	NA	0.682353	0.758929
03	Amb	arms	"The soldiers are weary", the general noted in his diary.	It was getting dark.	They finally put down their arms.	1	related	mission	2	Untrained	Trained	0.11	4	56.7458	2	6.3704	2.2059	0.869565	0.878981
04	Amb	ash	The different species in the nature reserve would make for some spectacular photographs.	Laura was inspired.	She positioned herself to get a better view of the ash.	1	related	scenery	1	Trained	Untrained	0.01	3	15.6232	1	NA	NA	0.891089	0.87069
58	Amb	band	Joan was looking for a strip of shiny silk to make a belt for her gown.	It was difficult to find something decent.	She was very happy when she finally saw the band.	1	related	sewing	2	Untrained	Trained	-0.01	4	86.2007	NA	6.069	3.0588	0.842593	0.818182
05	Amb	bank	Suzy wasn't a great swimmer compared to the other children.	It had always been quite difficult for her.	She was relieved when she finally reached the bank.	1	related	float	1	Trained	Untrained	0.01	4	190.61	NA	6.25	3.2571	0.955446	0.948357
60	Amb	beech	The beetle was looking for some nice leaves for his lunch.	There was a lot of choice.	He really liked the beech.	0	related	hungry	1	Trained	Untrained	0.1	5	2.19857	NA	NA	NA	0.974359	0.966942
61	Amb	berth	People all over the world were fascinated by the ship's tragic history.	They travelled a long way.	It was only to see its berth.	0	related	landmark	2	Untrained	Trained	0.26	5	0.987618	1	NA	NA	0.981651	0.981982
08	Amb	bulb	Joyce was a keen gardener, and loved spending time outside in her dungarees and wellies.	It was her happy place.	This morning, she had a close look at the bulb.	1	unrelated	jet	1	Trained	Untrained	-0.01	4	4.79913	1	6.0769	3.1333	0.575	0.701754
09	Amb	calves	John knew it was going to be muddy when he went out for a run in the rain.	What a mess!	He would need to scrub his calves.	1	unrelated	nation	1	Trained	Untrained	-0.01	6	8.66026	NA	5.3103	3.1429	0.604938	0.716814
10	Amb	cape	Kurt had won a place on the sailing expedition in the raffle.	It would be a wonderful experience.	He was hoping that he would finally get to see the cape.	1	related	prize	2	Untrained	Trained	0.16	4	8.9233	NA	4.4828	3.3824	0.971429	0.972222
11	Amb	change	Lola emptied her old handbag when she did her spring clean.	It must have been years since she had seen it last.	She wasn't surprised when she discovered the change.	1	unrelated	priority	2	Untrained	Trained	0.04	6	306.127	1	6.3448	2.7429	0.516854	0.674242
12	Amb	chest	The archaeologists were excited to finally find the lost treasure in the pyramid.	It had been a long, hard search.	Now they could take a close look at the chest.	1	unrelated	link	1	Trained	Untrained	0	5	30.3035	NA	5.5926	3.0938	0.17037	0.54
62	Amb	chord	During Natalie's music lessons, her teacher secretly wore earplugs.	There was no need today.	She actually found the chord.	0	unrelated	roof	1	Trained	Untrained	0.44	5	3.96536	NA	5.1563	4.5758	0.620253	0.699115
14	Amb	cold	Felicity had run out of medicine but she could hardly get out of bed.	Every year, it was the same thing.	This time she had been hit particularly badly by the cold.	1	related	unwell	1	Trained	Untrained	0.03	4	128.241	NA	6.4375	1.8286	0.849315	0.869048
15	Amb	corn	Lydia was in a lot of pain after standing all day at the tills.	She left work late.	At home, she had a close look at the corn.	1	related	ache	1	Trained	Untrained	-0.04	4	8.79426	NA	5.2857	2.9143	0.980583	0.971698
16	Amb	crane	Even with his binoculars, Joe couldn't find the source of the hooting noise.	He waited a few minutes.	Then he finally saw the crane.	1	unrelated	cannon	1	Trained	Untrained	0.08	5	5.47904	NA	NA	NA	0.473684	0.642512
17	Amb	cup	Lucy had excelled at basketball when she was a girl.	It had been her passion.	There were lots of photos of her holding a cup.	1	related	hoop	1	Trained	Untrained	0.04	3	124.023	1	6.4667	1.6571	0.965217	0.966387
63	Amb	cymbal	The musician checked the recording through his headphones.	It was pretty good.	He paid particular attention to the cymbal.	0	unrelated	bramble	2	Untrained	Trained	N/A	6	0.392069	2	NA	NA	0.301471	0.588745
18	Amb	digit	The fishermen found some human remains in the shark's stomach.	They had expected to find something big.	But they only found a single digit.	1	unrelated	goblin	2	Untrained	Trained	-0.05	5	1.69235	NA	4.875	4.4706	0.486486	0.660714
19	Amb	drill	Richard generally liked life in the army because of the clear hierarchies.	But there were some things he hadn't got used to.	He had never really liked waking up to the drill.	1	related	regiment	1	Trained	Untrained	0.03	5	9.097	1	4.8387	3.4706	0.882979	0.895238
20	Amb	drums	The workers on the offshore rig were expecting a delivery of compressors.	But there wasn't enough room.	First they had to move the drums.	1	related	full	1	Trained	Untrained	0	5	21.5241	1	5.1429	2.5625	0.990826	0.990909
21	Amb	earth	When the little squirrel fell, his mother was worried he might break a limb.	It was a long journey down.	But he landed safely on earth.	1	unrelated	decorative	2	Untrained	Trained	0.02	5	99.9578	1	6.2059	2.6765	0.571429	0.7
22	Amb	fans	The singer was nervous because he had some serious problems with his voice.	It had bothered him for a while now.	He was concerned about the fans.	1	unrelated	plot	2	Untrained	Trained	0.03	4	51.7879	1	NA	NA	0.645833	0.738462
64	Amb	fete	The residents had put up tents, and were selling baked goods and lemonade.	It was a lovely day.	They had clearly thought a lot about the fete.	0	unrelated	splash	1	Trained	Untrained	N/A	4	1.37472	1	NA	NA	0.679245	0.757143
23	Amb	file	The hamster's claws had become so long that he found it painful to scratch his belly.	Sarah knew exactly what to do to help.	She went and found the file.	1	related	sharp	1	Trained	Untrained	0	4	11.8862	1	5.9667	4.0909	0.759563	0.802632
65	Amb	fir	Rob was reading up on the local botany before his hike.	It was a welcome distraction.	He especially liked the fir.	0	related	vegetation	1	Trained	Untrained	-0.01	3	1.5782	1	NA	NA	0.951923	0.954128
24	Amb	glasses	To impress his guests, Jasper had spent hours cleaning the dining room.	Then it suddenly dawned on him.	He had forgotten to wipe the glasses!	1	related	visitors	1	Trained	Untrained	0.12	7	23.5539	3	6.4	2.8235	0.927419	0.932331
25	Amb	habit	Peter was making every effort to follow the monastery's strict schedule.	It wasn't very easy.	Every morning he spent half an hour struggling with his habit.	1	unrelated	range	1	Trained	Untrained	0.12	5	10.9085	2	5.931	3.8462	0.75	0.8
26	Amb	horns	The little boy carefully stroked the stag's head with his hand.	It felt a bit funny.	He really liked the horns.	1	unrelated	diamond	1	Trained	Untrained	0.04	5	12.4867	1	4.7333	2.8286	0.388889	0.6
59	Amb	isle	Paul wanted to ride along the entire coast on his bicycle.	But halfway through he had to give up.	It was a very long isle.	0	related	exercise	1	Trained	Untrained	0.09	4	15.6877	2	5.1034	4.4412	0.907216	0.915094
27	Amb	kids	The sound of hooves announced the arrival of the antelopes from the mountains.	They enjoyed the late afternoon sun.	Amongst them were some kids.	1	unrelated	centre	2	Untrained	Trained	-0.01	4	60.2099	1	NA	NA	0.4	0.606061
67	Amb	knight	The jousting was about to start, but Sir Robin still needed to repair his stirrup.	People were getting restless.	Everyone was waiting for the knight.	0	related	battle	2	Untrained	Trained	0.5	6	15.5041	1	4.4839	3.2258	0.769231	0.8125
28	Amb	lace	Great-grandma's wedding dress had long sleeves.	Rebecca was amazed.	But she was worried about the condition of the lace.	1	unrelated	matrix	1	Trained	Untrained	0.41	4	5.31031	1	5.4138	3.8	0.237288	0.561905
68	Amb	leek	Barry carefully put all the ingredients next to the bowl.	He wasn't quite ready.	He needed to find the leek.	0	unrelated	clown	1	Trained	Untrained	0.01	4	3.64773	1	NA	NA	0.265823	0.572464
30	Amb	letter	After school, Harry practised his writing skills with a big quill.	He wasn't making as much progress as he had hoped.	He still had some difficulty with the letter.	1	related	ink	1	Trained	Untrained	0.11	6	71.173	2	5.9032	2.5758	0.841121	0.862903
31	Amb	litter	Zoe's parents took her to the pet shop to finally choose her birthday gift.	When she walked through the door, she was a bit nervous.	She could already see the litter.	1	related	surprise	1	Trained	Untrained	0.05	6	8.53123	2	5.9667	3.1176	0.916667	0.923077
32	Amb	marble	The couple couldn't decide which materials to use in their new house.	They wanted something special.	In the end, they chose the marble.	1	unrelated	swear	1	Trained	Untrained	-0.02	6	7.2508	NA	NA	NA	0.105263	0.527778
33	Amb	march	Sabrina watched all the people moving slowly past her window.	She admired their determination.	So she decided to join this march.	1	unrelated	password	2	Untrained	Trained	0	5	45.8274	NA	NA	NA	0.166667	0.545455
34	Amb	match	At the stadium, Heather bought a hot dog.	Afterwards she returned to her seat.	It was a good match.	1	unrelated	mail	2	Untrained	Trained	-0.02	5	132.951	NA	5.6429	3.125	0.603896	0.678414
35	Amb	mould	Jimmy wanted to bake something special for his daughter's graduation.	He had set aside some time this afternoon.	But he couldn't find the mould.	1	unrelated	attic	2	Untrained	Trained	-0.05	5	0.858582	1	NA	NA	0.734177	0.79
69	Amb	mussels	The customers knew that Ed's cooking always had a lot of garlic.	It was great.	They especially loved his mussels.	0	unrelated	obligation	1	Trained	Untrained	0.02	7	1.79161	2	4.1765	4.5429	0.466667	0.652174
37	Amb	nail	Mike was excited to finally build the bookcase.	It wasn't very difficult.	But he knew that he needed to be careful with his nail.	1	unrelated	frog	2	Untrained	Trained	0.03	4	15.0823	1	6.0385	2.6	0.210084	0.556075
38	Amb	nuggets	The cowboy waded through the river with his sieve, carefully looking through the rocks and sand.	He had entirely lost track of time.	But he really wanted some nuggets.	1	unrelated	stamp	1	Trained	Untrained	0.03	7	1.11169	2	4.7419	3.4	0.6	0.714286
39	Amb	organ	The antiques shop had some musical instruments that needed repair.	It would be a difficult job.	The expert was very careful when he had a look at the organ.	1	unrelated	spreadsheet	2	Untrained	Trained	0.09	5	9.6727	2	5.5385	4.3438	0.473684	0.655172
70	Amb	pair	The children learned about King Henry VIII and Katherine of Aragon for their exam.	It wasn't easy.	They didn't remember a lot about the pair.	0	unrelated	chocolate	2	Untrained	Trained	0.02	4	81.9226	1	6.1786	2.7813	0.605263	0.716981
41	Amb	palm	Jill wandered around the botanical gardens with her sketch book and pencil.	She finally found something interesting.	It was a lovely palm.	1	unrelated	burrow	2	Untrained	Trained	0.04	4	7.33517	NA	NA	NA	0.534884	0.671875
42	Amb	panel	The reporter had been waiting for the announcement but decided to go home.	Not much would be happening today.	After all, it was a very large panel.	1	unrelated	rabbit	2	Untrained	Trained	-0.04	5	24.3976	NA	NA	NA	0.046875	0.512
71	Amb	piece	Eric finally received the order so he could fix his car.	He was relieved.	It had been difficult waiting for the piece.	0	related	mechanics	2	Untrained	Trained	-0.03	5	186.372	1	6.1034	2.4118	0.755556	0.803571
01	Amb	plant	The photographer liked to take pictures of the industrial estate at sunset.	It was very eerie.	He especially liked the look of the plant.	1	related	landscape	2	Untrained	Trained	-0.04	5	64.349	1	6.25	2.4848	0.978571	0.965517
44	Amb	play	The stage was revealed from behind the thick curtains to the sound of a violin.	Rita leaned back.	She was looking forward to a good play.	1	unrelated	distributor	2	Untrained	Trained	0.18	4	489.02	1	6.1071	1.8235	0.238095	0.552632
45	Amb	poker	The fireplace was the dog's favourite spot in the cottage.	It was warm and cosy.	He liked to watch the poker.	1	related	comfort	2	Untrained	Trained	0.1	5	6.06963	NA	4.9714	5.25	0.88785	0.89916
47	Amb	pupil	Miss Clemence knew exactly who would need to be disciplined for the chaos in the hallway.	This just could not go on.	She would need to watch that pupil.	1	unrelated	branch	1	Trained	Untrained	0.09	5	8.56597	2	5.4815	3.4	0.53125	0.680851
48	Amb	ruler	The people in the country lived a peaceful life, and enjoyed rich harvests.	It was not a surprise.	They had a good ruler.	1	unrelated	bleach	1	Trained	Untrained	0.06	5	4.29291	2	5.7593	2.8529	0.720812	0.781746
75	Amb	son	The new father was excited when he brought home the bundle.	It was such a relief.	He had been waiting for the son.	0	related	newborn	2	Untrained	Trained	0.42	3	146.435	1	6.0968	2.2286	0.916667	0.917197
51	Amb	star	The actor paid to have his portrait painted on canvas.	He was very happy with it.	It was a fairly accurate depiction of the star.	1	related	act	2	Untrained	Trained	0.02	4	109.854	2	6.3235	1.9714	0.921569	0.871795
76	Amb	storeys	The house was a lot bigger than shown in the brochure.	It was impressive.	There were so many different storeys.	0	related	property	2	Untrained	Trained	0	7	6.74955	NA	NA	NA	0.956522	0.958333
77	Amb	suite	During weekdays, Silvia often stayed overnight in the city.	She never looked forward to it.	But it wasn't too bad when she could choose her favourite suite.	0	related	sleep	2	Untrained	Trained	-0.11	5	24.7599	NA	NA	NA	0.909091	0.891892
54	Amb	table	The scientist had spent months collecting information about the chemical.	She was excited.	She couldn't wait to show everyone the table.	1	related	research	1	Trained	Untrained	0.04	5	126.579	2	6.7143	2.2903	0.909091	0.916667
78	Amb	tee	He was hoping for a hole in one, so Phil checked the green for uneven bits of grass.	It went very well.	It also helped that he had bought a new tee.	0	related	club	2	Untrained	Trained	0.12	3	7.05725	1	NA	NA	0.954545	0.956522
55	Amb	temple	The surgeon explained where he would make the first cut with his scalpel.	It was very simple.	He pointed at the temple.	1	unrelated	grocery	2	Untrained	Trained	-0.05	6	10.7248	2	4.963	4.1212	0.586826	0.695833
56	Amb	toast	The wedding was in full swing, and the dancefloor was already filled with dancers.	Jennifer was having a great time.	She couldn't wait for the toast.	1	related	marriage	2	Untrained	Trained	0.07	5	18.5513	1	6.1852	2.1176	0.948837	0.951327
57	Amb	trailer	Alfie queued up to buy some popcorn with his pocket money.	It was so exciting.	He was looking forward to seeing the new trailer.	1	unrelated	sock	1	Trained	Untrained	-0.09	7	4.80409	2	5.2222	4.2813	0.503448	0.668203
72	Amb	peek	Three little boys peeped through the window to watch Edna wipe the mirror.	She was so busy.	She didn't see the peek.	0	related	cleaning	1	Trained	Untrained	0.26	4	5.68749	NA	4.9	2.3714	0.785714	0.823529
80	Amb	wail	The new parents finally tip-toed out of the bedroom, and sat down on the sofa.	It was a nice moment.	And then came a very big wail.	0	related	interruption	2	Untrained	Trained	0.1	4	0.784139	NA	NA	NA	0.896907	0.906542
81	Amb	waist	When Marigold first wore her bikini, it caused quite the scene in the little seaside town.	"How revolting", people would say.	"There's nothing covering the waist!"	0	unrelated	funeral	1	Trained Untrained		0.09	5	5.12172	NA	5.7037	3.8235	0.552632	0.690909
83	Amb	yoke	The ox was getting quite angry while transporting the wheat.	He was usually content.	But he didn't like the yoke.	0	related	cargo	2	Untrained	Trained	0.02	4	0.893322	1	NA	NA	0.83871	0.837838
F14	Filler	boat	Michael was sad because he lost a lot of money at the casino.	He wanted to do something to cheer himself up.	But this might not have been the best time to buy a boat.	NA	unrelated	glare	NA	NA	NA	-0.03						NA
F04	Filler	brick	The architect liked to use unusual materials to make furniture.	He was very talented.	The desk that he worked at was made of brick.	NA	unrelated	environmental	NA	NA	NA	0.12						NA
F06	Filler	cactus	It was a long journey through the desert, so the group rode on camels.	It could get very boring.	But sometimes they came across a funny shaped cactus.	NA	unrelated	metal	NA	NA	NA	0.39						NA
F18	Filler	church	Alison was out in town when a guy pushed her and grabbed her wallet.	He was gone as quickly as he had appeared.	She could see him running past the church.	NA	related	thief	NA	NA	NA	-0.01						NA
F30	Filler	clue	The detective took one last look at the briefcase.	So far, nothing was making any sense.	He was desperately looking for a clue.	NA	related	police	NA	NA	NA	0.16						NA
F23	Filler	coffin	The vampire had lost his bow tie.	It was his favourite.	Maybe he had dropped it in his coffin.	NA	related	undead	NA	NA	NA	0.11						NA
F25	Filler	crowd	For the grand opening, the owners of the new shop gave out free ice cream.	It was a good idea.	Outside, there was a small crowd.	NA	related	popular	NA	NA	NA	0.08						NA
F22	Filler	cupboard	The young carpenter was working hard for his diploma.	He made sure to practise his skills.	The other week, he made himself a cupboard.	NA	related	wood	NA	NA	NA	0.02						NA
F15	Filler	dustbin	After a difficult maths lesson, the teacher asked, "Where is your calculator?".	Lauren didn't say anything.	All she did was silently point at the dustbin.	NA	unrelated	adopt	NA	NA	NA	N/A						NA
F20	Filler	eggs	The children had a lot of fun baking biscuits for Christmas.	But it didn't go very well.	They needed more eggs.	NA	related	recipe	NA	NA	NA	0.03						NA
F33	Filler	face	Hettie really didn't like seeing blood.	She had to sit down.	The doctors were concerned about the colour of her face.	NA	related	hospital	NA	NA	NA	0.09						NA
F31	Filler	footage	The midfielder disputed the decision of the referee.	It had been a tough call.	They would need to look at the footage.	NA	related	football	NA	NA	NA	-0.01						NA
F28	Filler	hornets	As he was mowing the lawn, Luke suddenly felt a sting on his nose.	It was painful.	He hadn't seen the hornets.	NA	related	insect	NA	NA	NA	0.04						NA
F35	Filler	jazz	Tim tried to ignore to the noise coming from the stage while he sipped his whiskey.	He raised his eyebrow.	He didn't really care for jazz.	NA	related	music	NA	NA	NA	0.02						NA
F17	Filler	knees	Bonnie's personal trainer had her on a rigorous new training regime at the gym.	It was quite brutal.	She went to the doctor when she hurt her knees.	NA	unrelated	apple	NA	NA	NA	0.06						NA
F02	Filler	labyrinth	The king had his gardeners improve the area around the palace.	It looked a lot better.	The garden now had a new labyrinth.	NA	unrelated	average	NA	NA	NA	0.37						NA
F29	Filler	leather	Gina pinned the cotton onto the mannequin.	It didn't seem right.	She thought it might look better with some leather.	NA	related	seamstress	NA	NA	NA	0.21						NA
F26	Filler	list	After he finally came home from the supermarket, Walter realised that he forgot the bananas.	It was so annoying.	He should have looked at the list.	NA	related	shopping	NA	NA	NA	0.02						NA
F03	Filler	mouths	Rupert was excited to feed the lambs.	They were very small.	But Rupert could see that they had big mouths.	NA	unrelated	screen	NA	NA	NA	0.09						NA
F13	Filler	nest	The palaeontologists were looking for any signs of dinosaurs.	It had been a long day.	They were very happy when they discovered the nest.	NA	unrelated	virus	NA	NA	NA	0.06						NA
F24	Filler	perfume	Jayne measured the oils and the lavender.	She was very careful.	In the end, she was happy with the perfume.	NA	related	smell	NA	NA	NA	0.04						NA
F05	Filler	phone	The baby didn't want to play with any of her own toys.	Everything else was more interesting.	She managed to steal her mum's phone.	NA	unrelated	lizard	NA	NA	NA	0.04						NA
F10	Filler	rope	Sue was looking forward to the climb, and got up early to pack her rucksack.	Today was the perfect weather for it.	She made sure to pack the rope.	NA	unrelated	opponent	NA	NA	NA	0.07						NA
F07	Filler	shrubs	The cat liked looking out of the window to watch the foxes.	It was good fun.	They would suddenly appear from behind the shrubs.	NA	unrelated	skirt	NA	NA	NA	-0.05						NA
F09	Filler	song	The Christmas party involved a karaoke machine and a lot of wine.	Everyone had a great time.	They all remembered the song.	NA	unrelated	stray	NA	NA	NA	0.05						NA
F19	Filler	statue	The historian wandered around the ancient city with her camera.	It was a fascinating day out.	She took a lot of pictures of the statue.	NA	related	tourist	NA	NA	NA	0.29						NA
F27	Filler	storm	After getting wet in the rain, the family huddled together under a blanket.	They stayed there for a while.	From inside they could hear the storm.	NA	related	thunder	NA	NA	NA	0.27						NA
F21	Filler	thigh	Robert usually made sure that he wore enough suncream.	It was very important to him.	But today he completely forgot about his thigh.	NA	related	burn	NA	NA	NA	0.09						NA
F16	Filler	throne	The little duke liked playing pranks on people, and was generally a bit of a clown.	That was just his personality.	It was hard to imagine that he would one day sit on the throne.	NA	unrelated	planet	NA	NA	NA	0.04						NA
F12	Filler	thumb	The toddler ran to his mother when he got hurt on the playground.	It wasn't too bad.	She carefully kissed the thumb.	NA	unrelated	real	NA	NA	NA	0.09						NA
F32	Filler	towel	Nick was hanging out the washing using his new pegs.	Then he suddenly remembered.	He had forgotten the towel.	NA	related	laundry	NA	NA	NA	0.07						NA
F01	Filler	veil	Hannah was relieved that the dress still fit her, and that she could walk in her shoes.	She was nervous.	Now all she needed was the veil.	NA	unrelated	security	NA	NA	NA	0.21						NA
F11	Filler	winner	The jockey had no chance with this stubborn horse.	He was disappointed.	In the distance, he could see the winner.	NA	unrelated	language	NA	NA	NA	0.1						NA
L04	Lead-in	blade	The man knew that it was going to be a difficult fight against the ninja.	But he was in good spirits.	He had had many years to get used to his blade.	NA	related	conflict	NA	NA	NA	0.06						NA
L03	Lead-in	greenhouse	The estate agent pointed out that the garden came with a pond.	Everything looked pretty good.	The buyer particularly liked the greenhouse.	NA	related	home	NA	NA	NA	-0.01						NA
L01	Lead-in	pastry	Pat joined the baking competition because she wanted to be on television.	But it was very difficult.	She didn't like working with pastry.	NA	related	dough	NA	NA	NA	0.09						NA
L02	Lead-in	steam	Christina boiled some water to make pasta.	She had never done it before.	There was a lot of steam.	NA	unrelated	forest	NA	NA	NA	0.16						NA
P04	Practice	bats	Paula spent most of October making Halloween-themed biscuits.	They looked fantastic.	The children liked the bats.	1	unrelated	carrot	NA	NA	NA	0.01						0.368421
P03	Practice	dice	Alex wasn't usually a gambler, but he trusted his luck.	The tension was unbearable.	All eyes were fixed on the dice.	NA	related	risk	NA	NA	NA	0.12						NA
P02	Practice	shears	The gardener's tools were all too rusty to cut down the ivy.	There was no helping it.	She would have to buy new shears.	NA	related	sausage	NA	NA	NA	0.19						0.83871
P01	Practice	wait	The lifeguard was bored sitting next to the water.	It was almost empty.	There were only a few men.	NA	related	swimming	NA	NA	NA	0.19						NA
